# Supplementary material for: Rapid detection of volatile organic compounds emitted from plants by multicapillary column-ion mobility spectrometry
Source: Royal Society of Chemistry journal article supplement (doi:10.1039/d4ay01817f), 2024-12-09
Supplement: d4ay01817f1.pdf [file d4ay01817f1.pdf]

## Supporting Information

### Rapid Detection of Volatile Organic Compounds Emitted from Plants by Multicapillary Column-Ion Mobility Spectrometry

Vahideh Ilbeigi<sup>\*1</sup>, Younes Valadbeigi<sup>2</sup>, Martina Zvaríková<sup>3</sup>, Peter Fedor<sup>3</sup>, Štefan Matejčík<sup>\*1</sup>

<sup>1</sup>Department of Experimental physics, Comenius University, Mlynská dolina F2, 84248 Bratislava, Slovakia.

<sup>2</sup>Department of Chemistry, Faculty of Science, Imam Khomeini International University, 34148-96818 Qazvin, Iran.

<sup>3</sup>Department of Environmental Ecology, and Landscape Management, Faculty of Natural Sciences, Comenius University, Bratislava, Slovakia.

**Corresponding authors' emails:** vahideh.ilbeigi@fmph.uniba.sk; stefan.matejcik@fmph.uniba.sk

| <b>content</b>                                                                                                             | <b>page</b> |
|----------------------------------------------------------------------------------------------------------------------------|-------------|
| <b>Figure S1. Experimental set up for detection of VOCs by Tenax-MCC-IMS</b>                                               | <b>S2</b>   |
| <b>Figure S2. (a) Punching of the blueberry leaves</b>                                                                     | <b>S3</b>   |
| <b>Figure S3. Photos of aphids and thrips on the blueberry leaves</b>                                                      | <b>S4</b>   |
| <b>Figure S4. The mass spectra of the vapour of standard VOCs</b>                                                          | <b>S5</b>   |
| <b>Figure S5. The experimental setup for introduction of diluted headspace of the standard VOCs into the glass chamber</b> | <b>S6</b>   |
| <b>Figure S6. Optimization of the sampling time.</b>                                                                       | <b>S6</b>   |
| <b>Table S1. The vapor pressures of the VOCs studied in this work at 25 °C.</b>                                            | <b>S7</b>   |

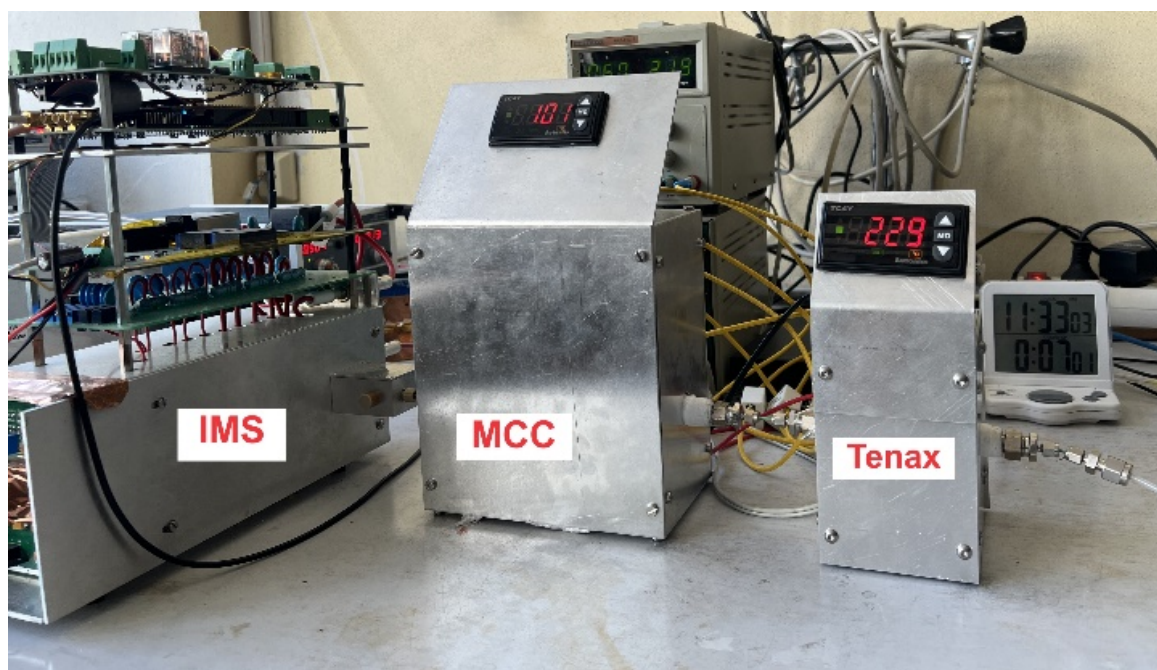

**Figure S1.** Experimental set up for detection of VOCs by Tenax-MCC-IMS. The VOCs are desorbed from the Tenax surface at 230 °C and entered into a MCC column with temperature of 110 °C via a flow of air with flow rate of 70 ml/min. Then, the separated VOCs are entered into the IMS.

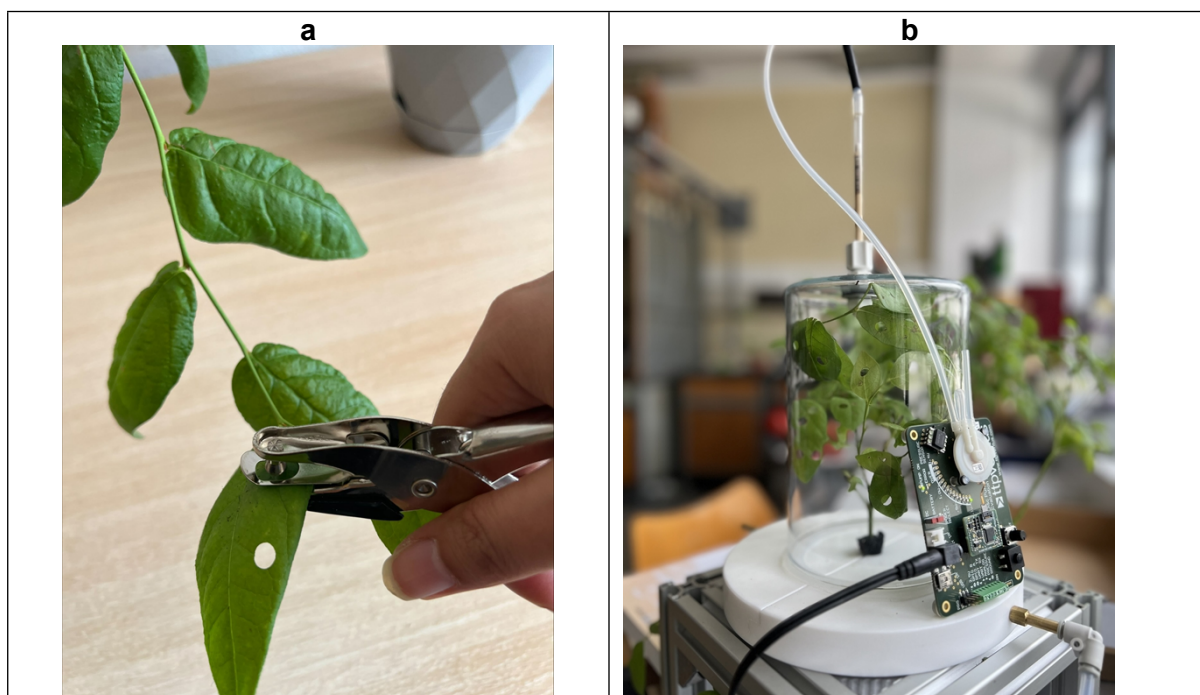

**Figure S2.** (a) Punching of the blueberry leaves to create holes with diameter of 6 mm. (b) The experimental setup for collecting of the VOCs emitted from the punched leaves of blueberry.

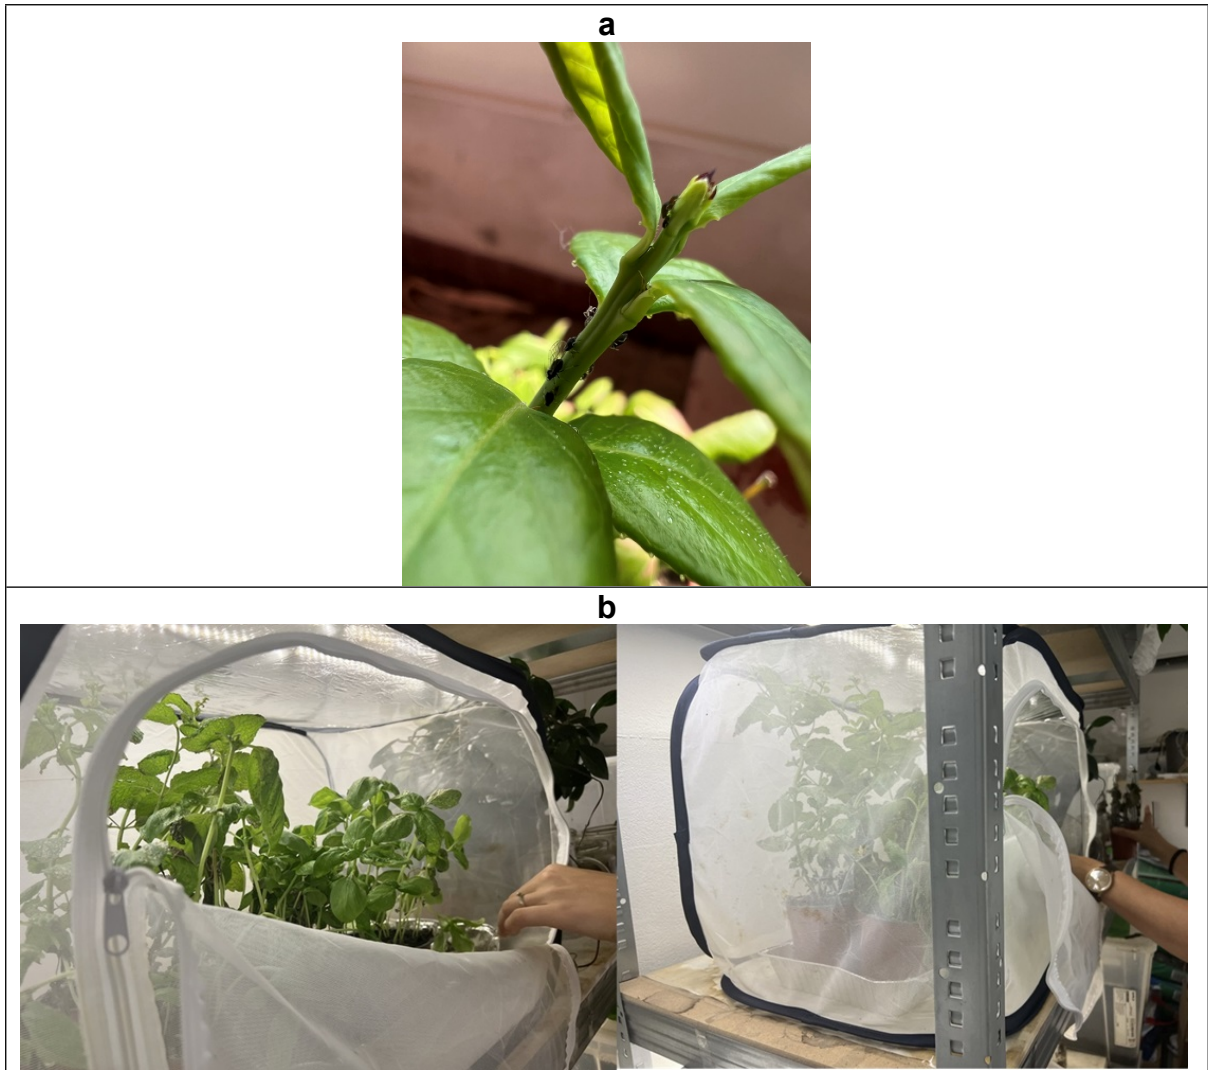

**Figure S3.** (a) Aphid insects were put on the blueberry leaves and (b) the blueberry plants were stored in a box with lace wall.

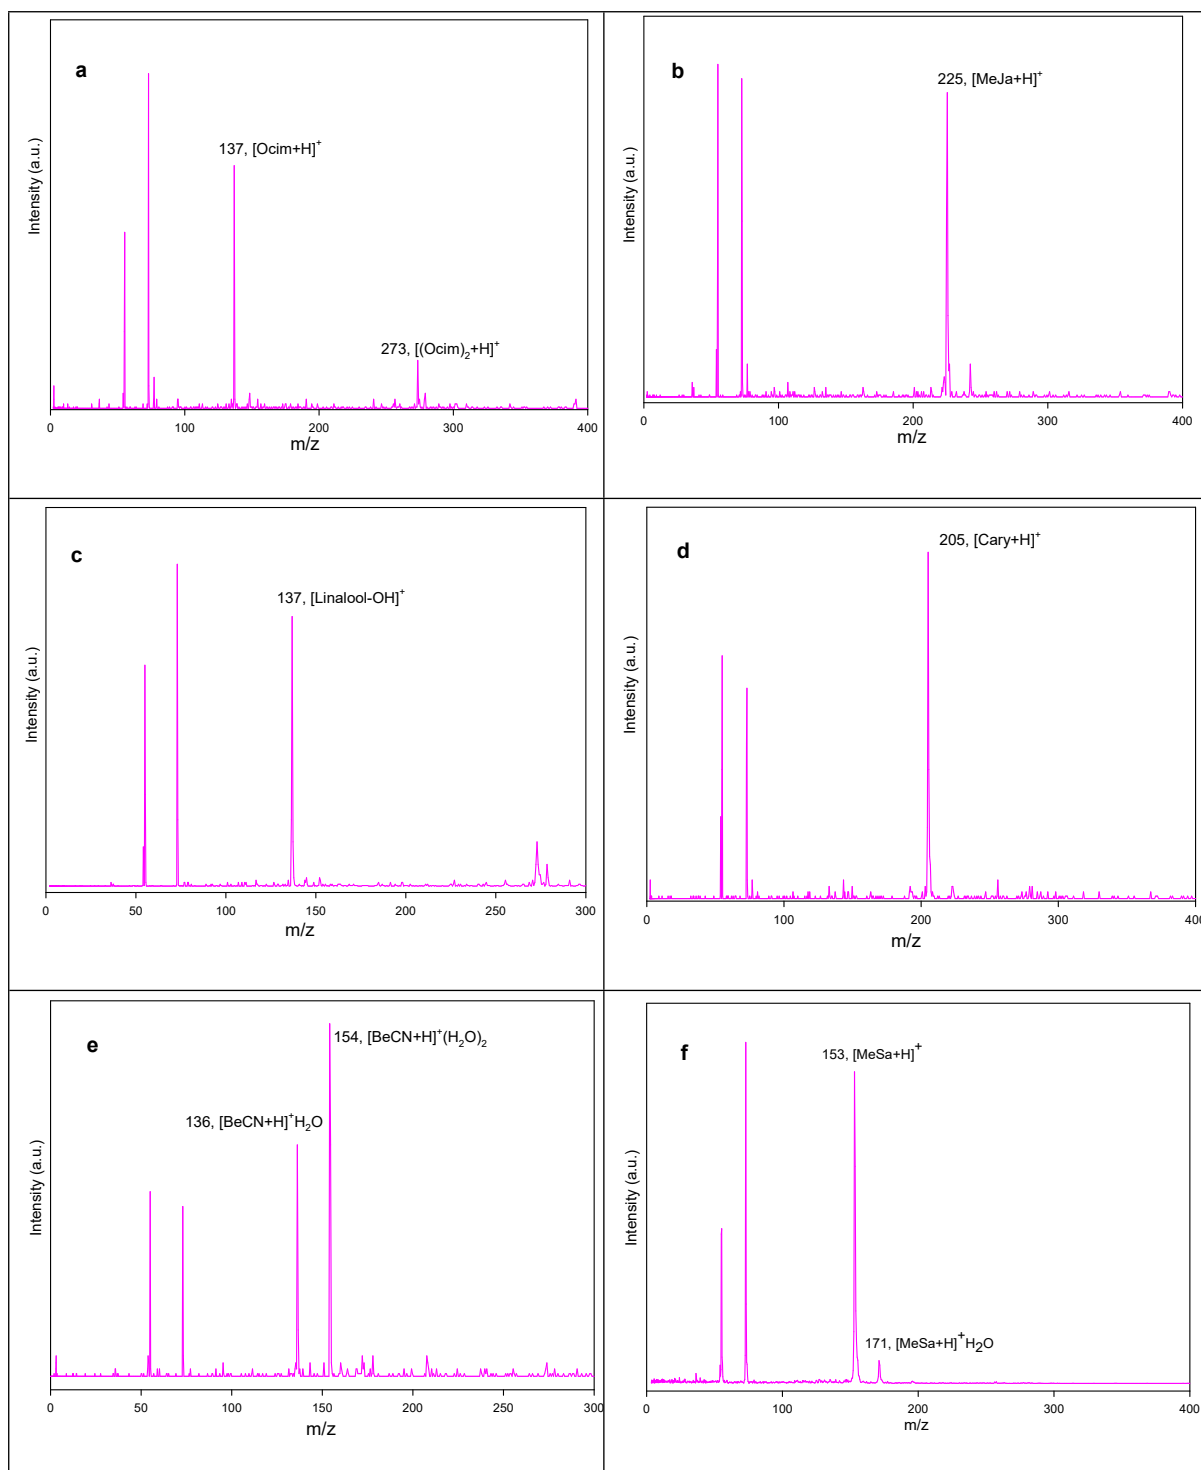

**Figure S4.** The mass spectra of the vapour of pure standards (a) ocimene, (b) methyl jasmonate (MeJA), (c) linalool, (d) caryophyllene, (e) benzene acetonitrile (BeCN), and methyl salicylate (MeSA).

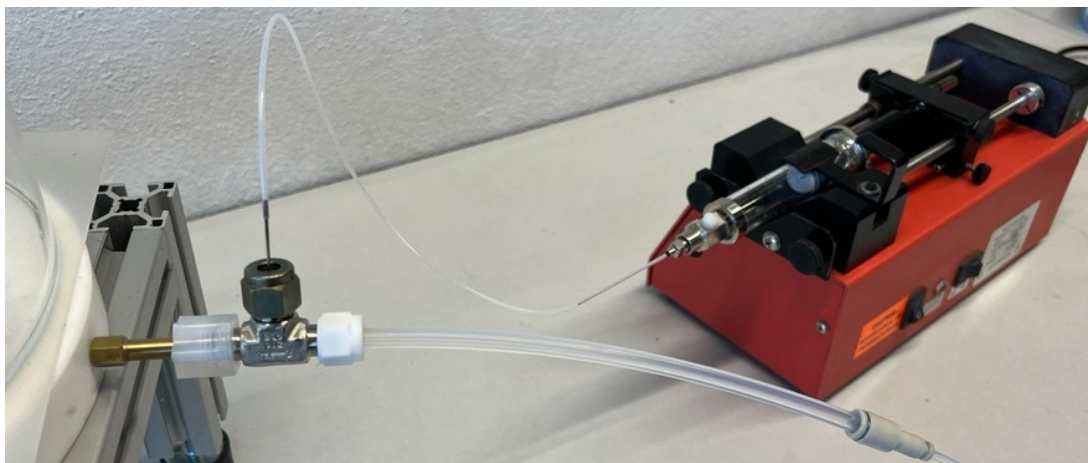

**Figure S5.** The experimental setup for introduction of diluted headspace of the standard VOCs into the glass chamber with flow rate of 1 ml/min.

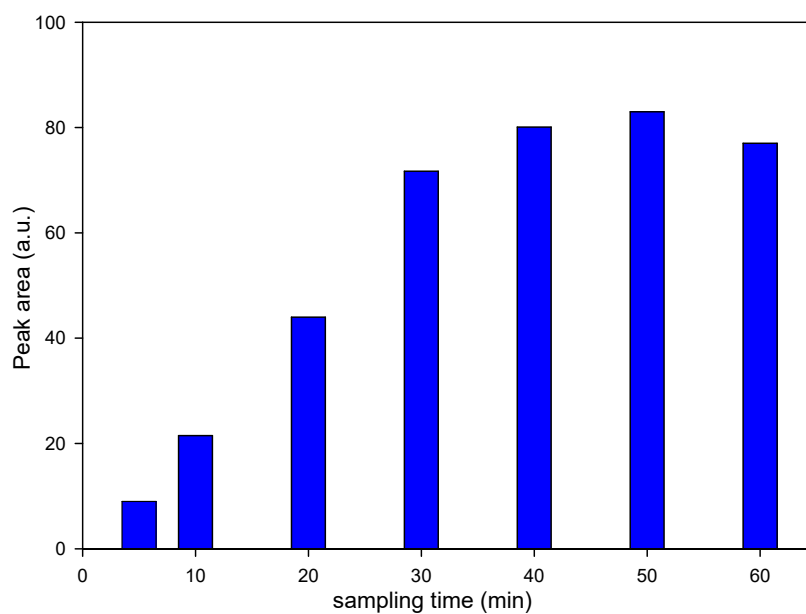

**Figure S6.** Optimization of the sampling time. The peak area of linalool ( $\sim 0.004$  mmHg) at different sampling times (the time of adsorption of linalool on the Tenax adsorbent).

**Table S1.** The vapor pressures of the VOCs studied in this work at 25 °C.

| VOC                  | Vapor pressure                          |
|----------------------|-----------------------------------------|
| Linalool             | 0.203 mm Hg <sup>a</sup>                |
| Methyl Salicylate    | 0.0343 mm Hg <sup>b</sup>               |
| Benzene acetonitrile | 0.089 mm Hg <sup>b</sup>                |
| Caryophyllene        | 0.021 mm Hg <sup>c</sup>                |
| Methyl Jasmonate     | $3.4 \times 10^{-4}$ mm Hg <sup>b</sup> |
| Ocimene              | 1.56 mm Hg <sup>d</sup>                 |

<sup>a</sup> M.A. Espinosa Diaz, T. Guetachew, P. Landy, J. Jose, A. Voilley, Experimental and estimated saturated vapour pressures of aroma compounds. *Fluid Phase Equilibria* **1999**, 157, 257–270.

<sup>b</sup> <https://pubchem.ncbi.nlm.nih.gov/>

<sup>c</sup> M. Hoskovec, D. Grygarova, J. Cvacka, L. Streinz, J. Zima, S. P. Verevkin, B. Koutek. Determining the vapour pressures of plant volatiles from gas chromatographic retention data. *J. Chromtogr. A.* 2005, 1083, 161-172

<sup>d</sup> <https://www.parchem.com/>
